# Supplementary material
Source: PubMed Central journal article supplement (PMC4097073)

Suppl. Fig.1

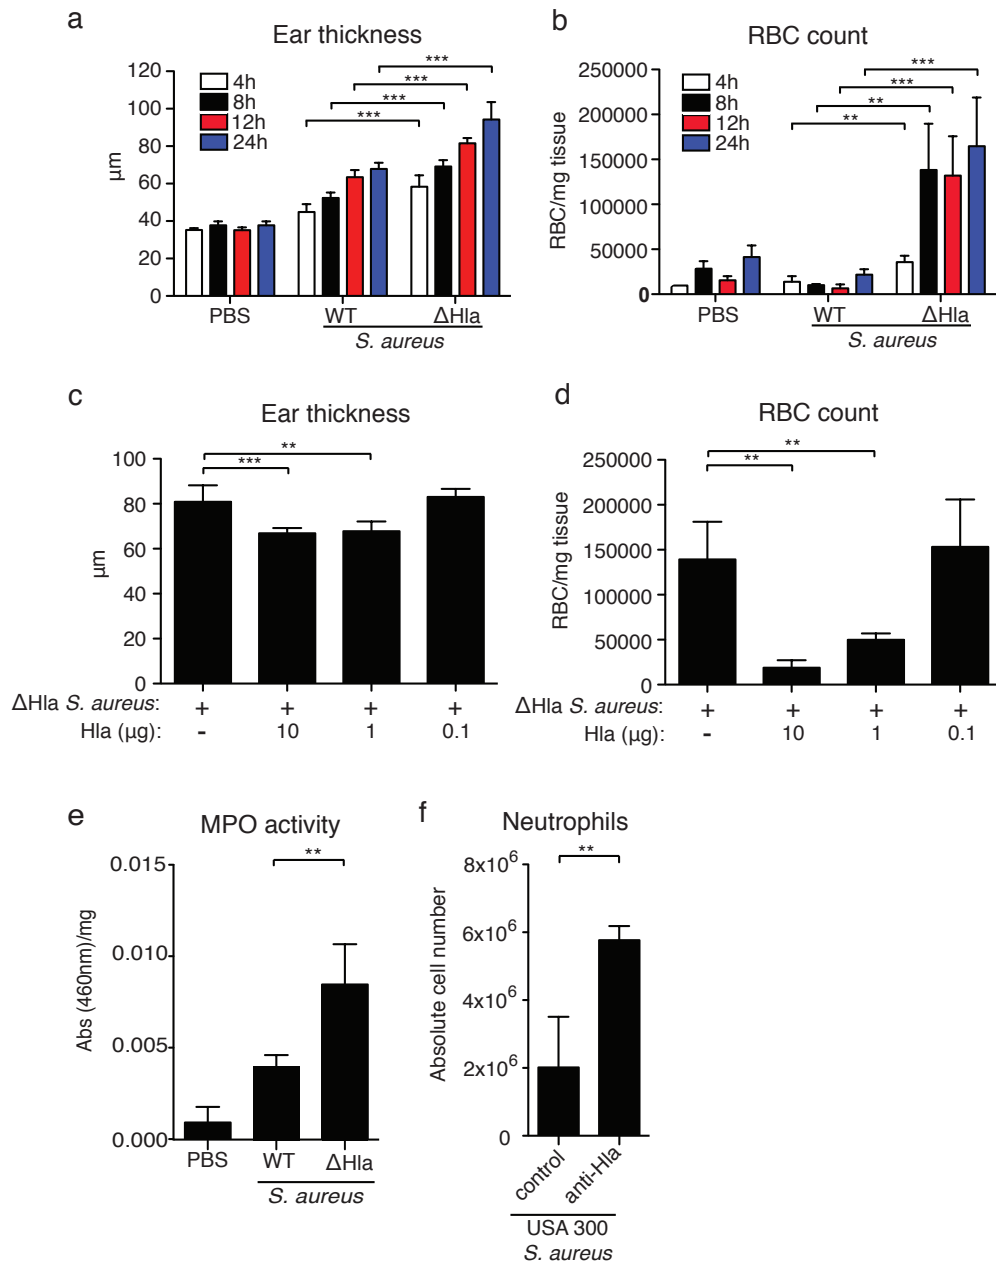

# Suppl. Fig.2

a

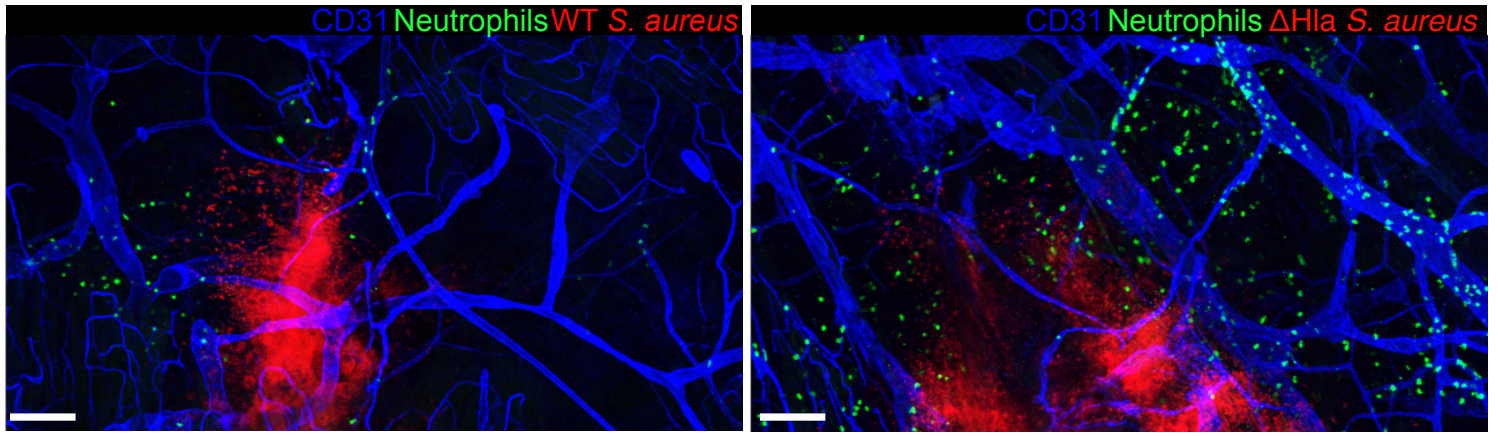

b

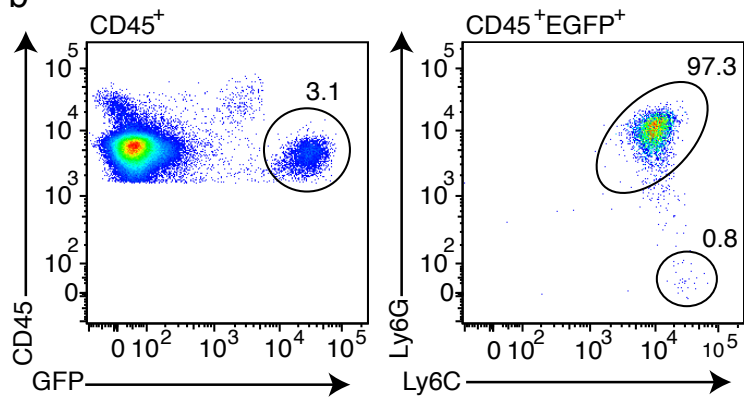

c

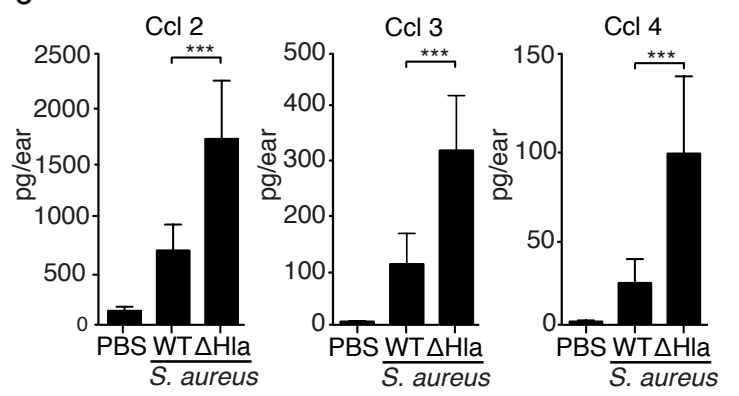

Suppl. Fig.3

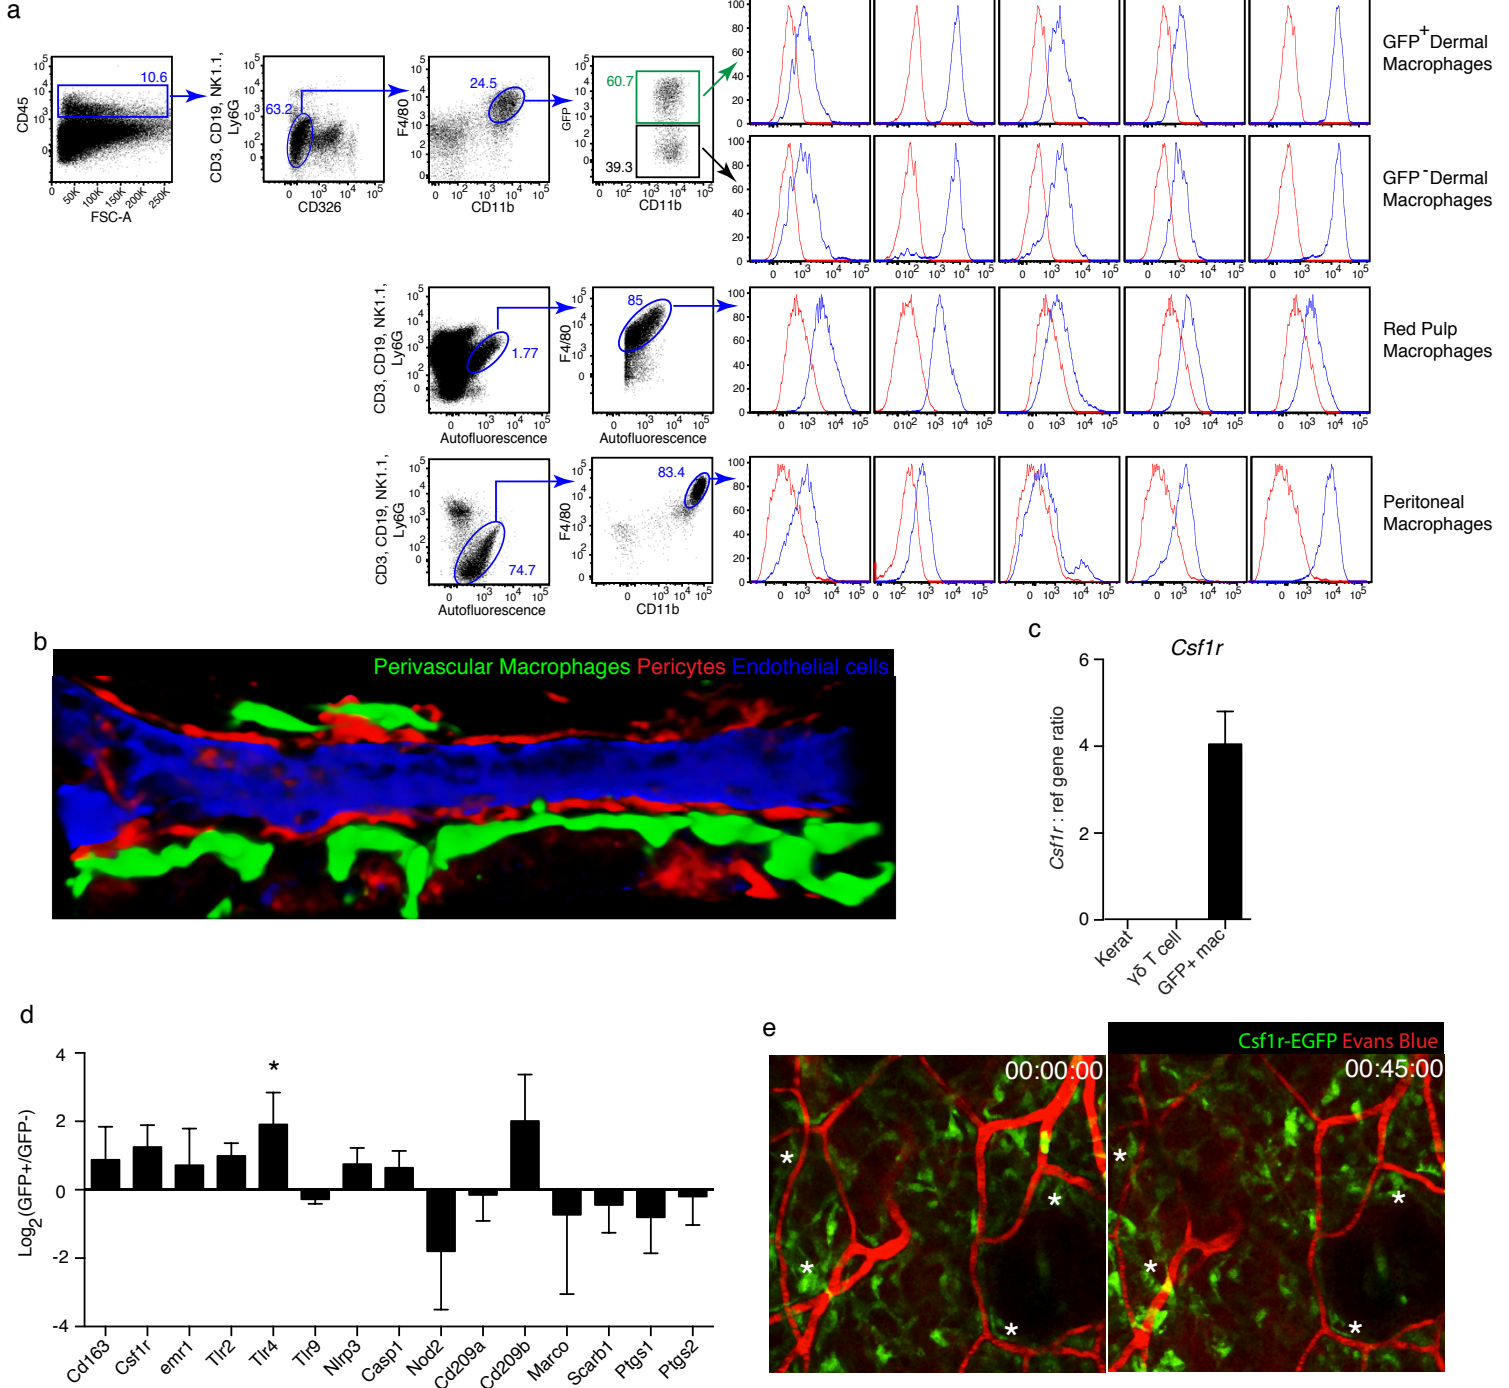

Suppl. Fig.4

a

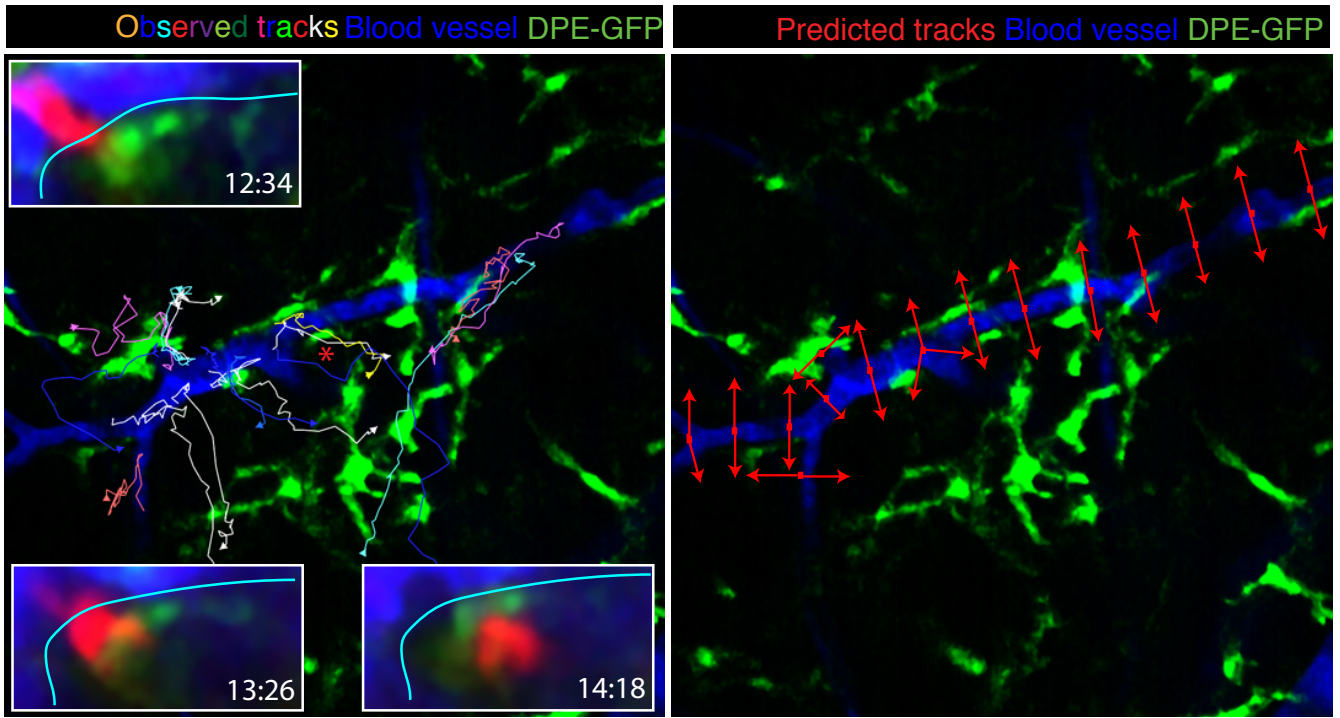

b

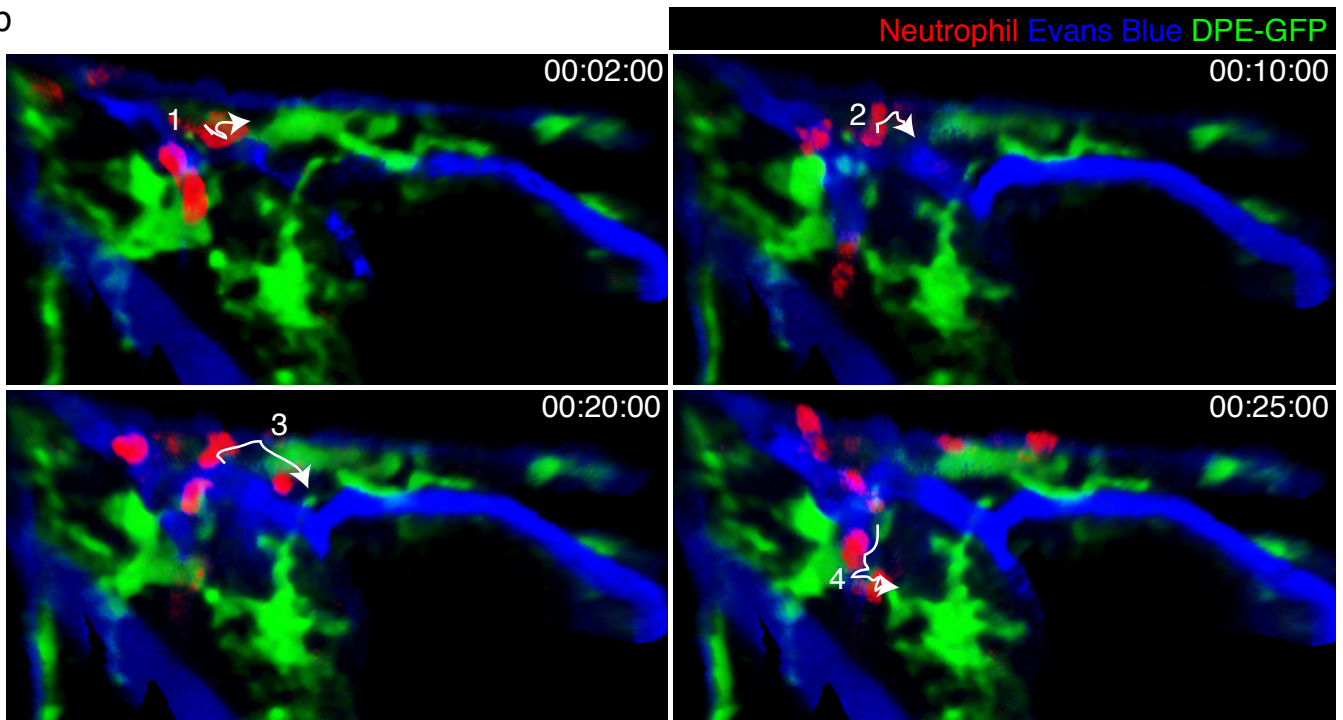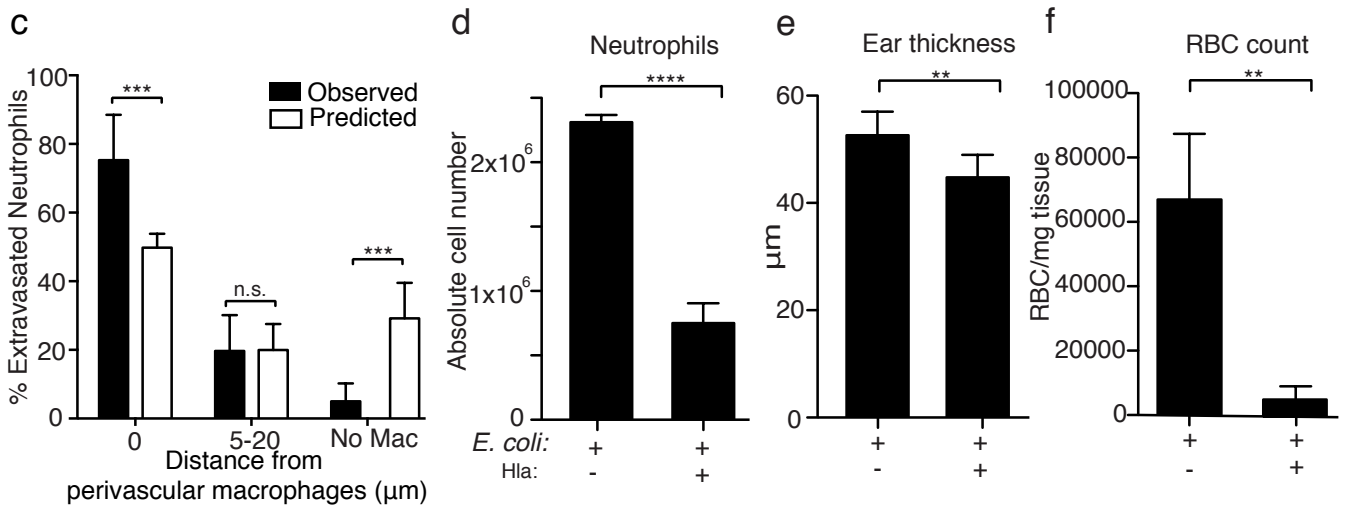

# Suppl. Fig.5

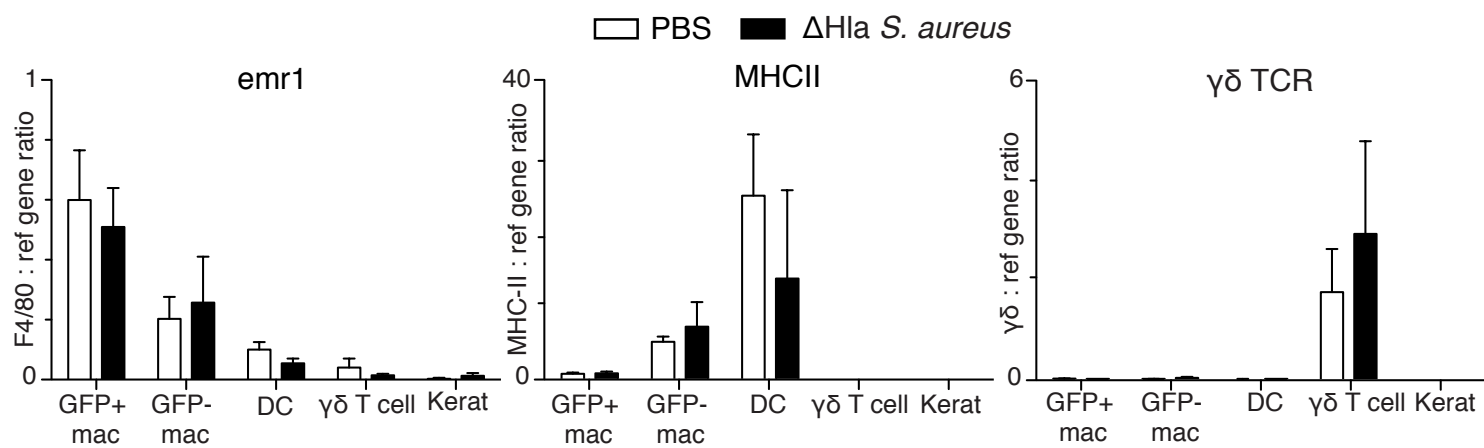

Suppl. Fig.6

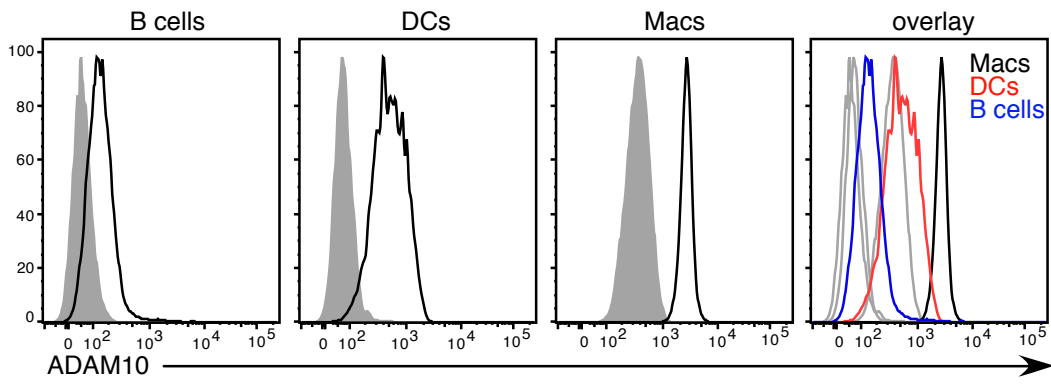

# Suppl. Fig.7

a

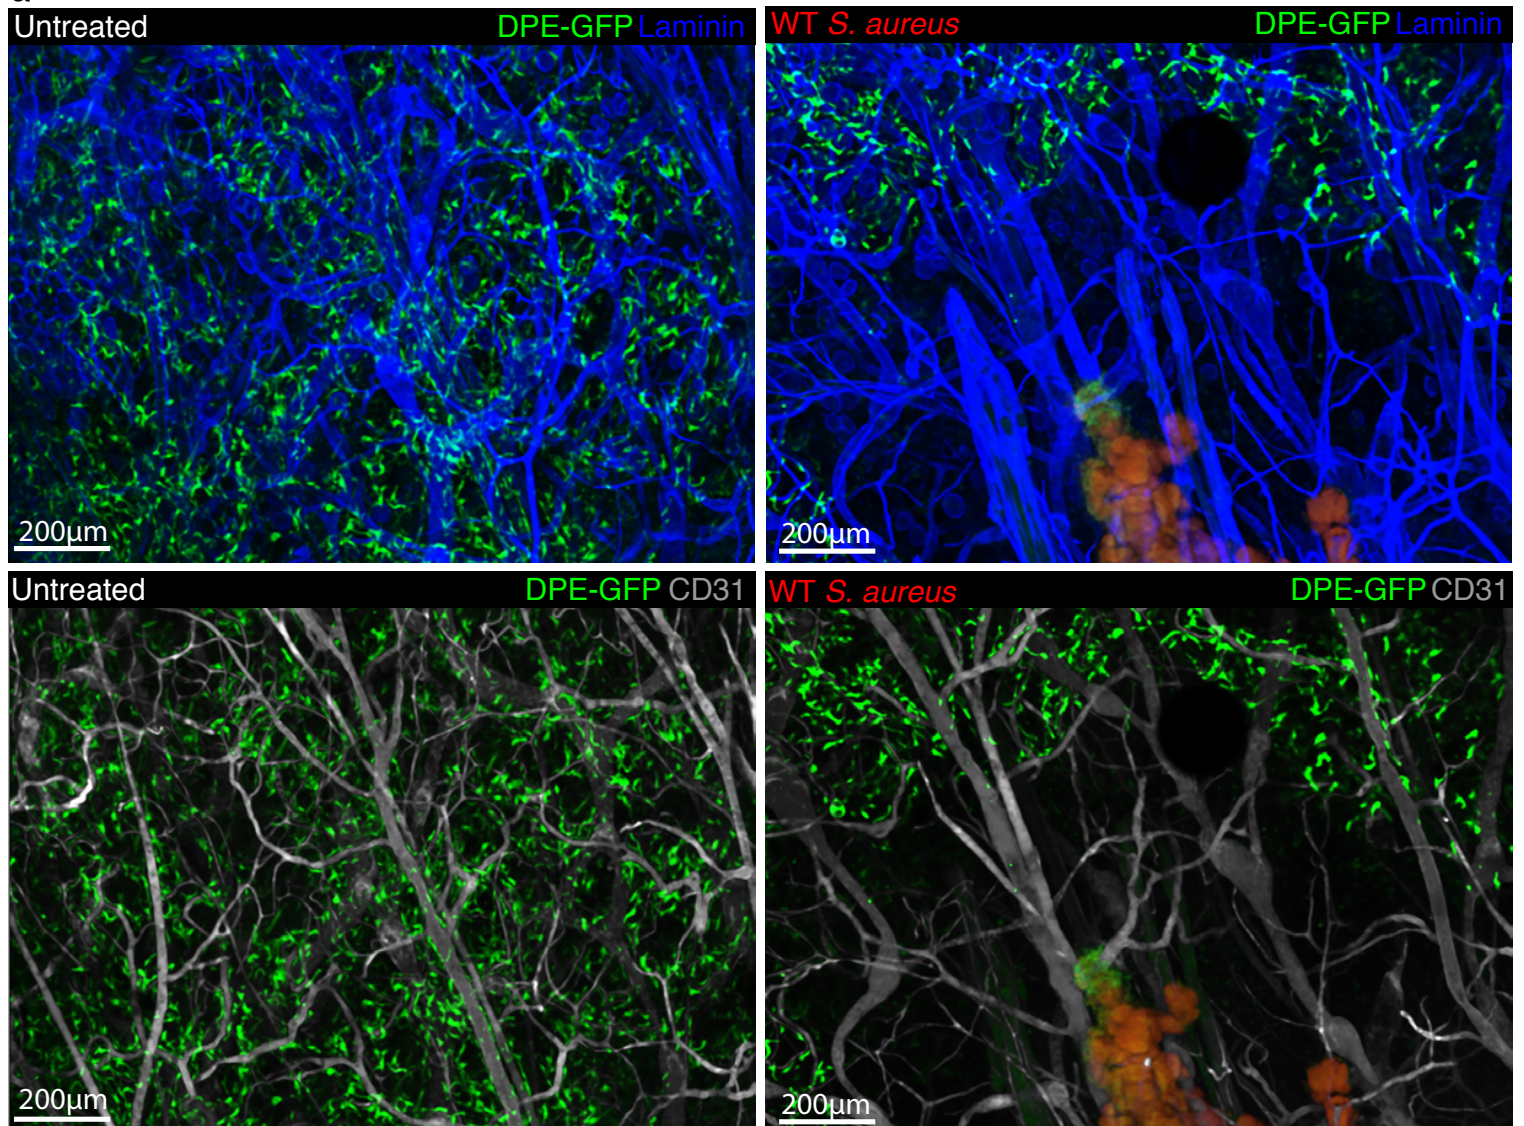

b

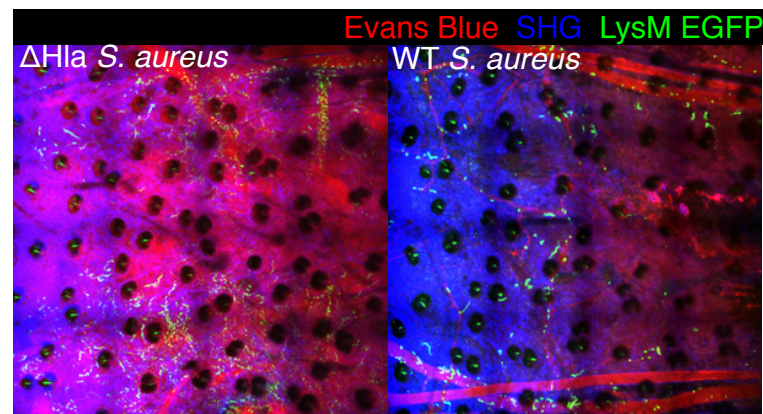

c

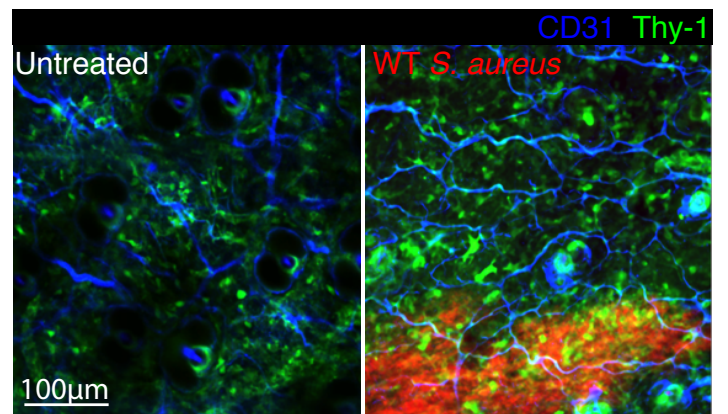

# Suppl. Fig.8

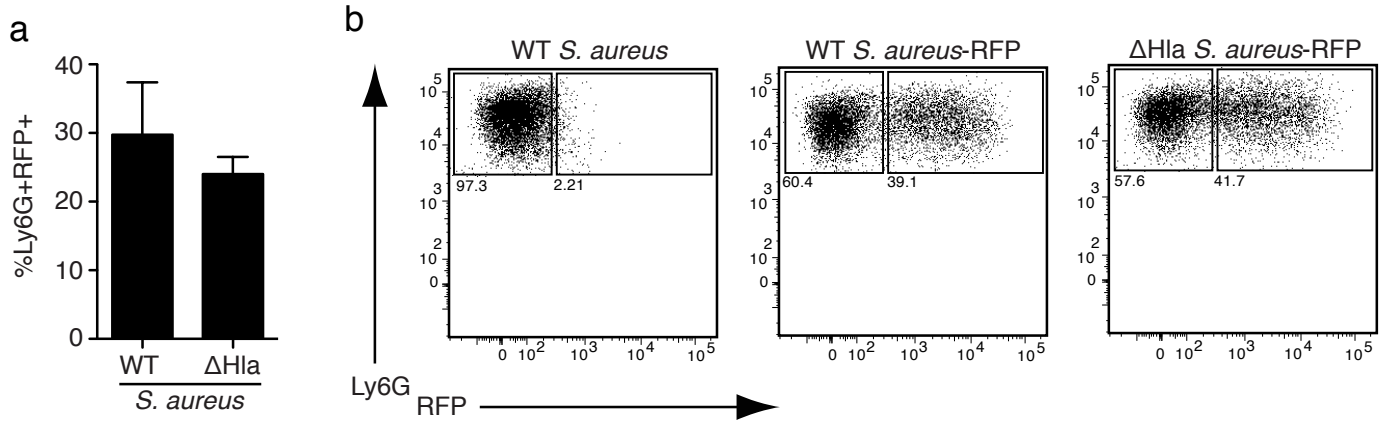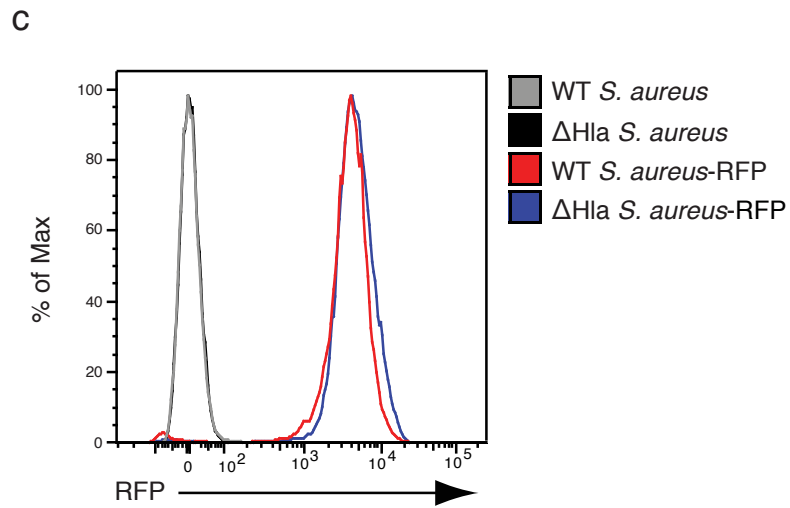

Supplement: NIHMS577484-supplement-Supp__Figs.pdf [file NIHMS577484-supplement-Supp__Figs.pdf]
